# Supplementary material for: Supplementary cranial description of the types of Edmontosaurus regalis (Ornithischia: Hadrosauridae), with comments on the phylogenetics and biogeography of Hadrosaurinae
Source: PubMed Central journal article supplement (PMC5383305; doi:10.1371/journal.pone.0175253), 2017-04-06
Supplement: pone.0175253.s002.pdf [file pone.0175253.s002.pdf]

## S1 Table

### Cranial linear measurements for the holotype and paratype of

#### *Edmontosaurus regalis*

Table 1 Linear measurements (in mm) of the holotype (CMN 2288)

| Element with measured attribute                                           | Measurement |
|---------------------------------------------------------------------------|-------------|
| Cranium, width of skull roof across central bodies of paired postorbitals | 220*        |
| Cranium, width of skull across jugal processes of paired postorbitals     | 286*        |
| Cranium, width of skull roof across quadrate cotyli of paired squamosals  | 195*        |
| Cranium, total length                                                     | 1060        |
| Cranium, maximum height                                                   | 585         |
| Cranium, length of circumnarial fossa                                     | 455         |
| Cranium, length of external naris                                         | 305         |
| Cranium, depth of external naris                                          | 95          |
| Cranium, width of orbit                                                   | 175         |
| Cranium, height of orbit                                                  | 220         |
| Cranium, width of dorsal region of infratemporal fenestra                 | 20          |
| Left quadrate, total height                                               | 420         |
| Left jugal, total length                                                  | 385         |
| Left nasal, total length                                                  | 575         |

\*The measurement is probably influenced by either taphonomic deformation or plaster reconstruction.

Table 2 Linear measurements (in mm) of the paratype (CMN 2289)

| Element with measured attribute                                           | Measurement |
|---------------------------------------------------------------------------|-------------|
| Cranium, width of skull roof across central bodies of paired postorbitals | 310         |
| Cranium, width of skull across jugal processes of paired postorbitals     | 425         |
| Cranium, width of skull roof across quadrate cotyli of paired squamosals  | 260         |
| Cranium, width of dorsal region of infratemporal fenestra                 | 18          |
| Cranium, maximum width of foramen magnum                                  | 110         |
| Cranium, length of supratemporal fenestra                                 | 170         |
| Cranium, maximum width of supratemporal fenestra                          | 80          |
| Cranium, width of skull across paroccipital processes                     | 320         |
| Cranium, depth of central shelf of paired exoccipitals                    | 115         |
| Left squamosal, length of quadrate cotylus                                | 76          |
| Right squamosal, length of quadrate cotylus                               | 76          |
| Parietal, total length                                                    | 212         |
| Left frontal, maximum width                                               | 118         |

|                                                                           |      |
|---------------------------------------------------------------------------|------|
| Right frontal, maximum width                                              | 114  |
| Left maxilla, length along ventral margin                                 | 430  |
| Left maxilla, total height                                                | 165  |
| Left maxilla, length of ectopterygoid ridge                               | 158  |
| Left maxilla, length of dorsal surface of anteroventral process           | 210  |
| Right maxilla, length along ventral margin                                | 440  |
| Right maxilla, total height                                               | 177* |
| Right maxilla, length of ectopterygoid ridge                              | 168  |
| Right maxilla, length of dorsal surface of anteroventral process          | 214  |
| Left jugal, total length                                                  | 365  |
| Left jugal, height of anterior process                                    | 170  |
| Left jugal, depth of anterior neck                                        | 73   |
| Left jugal, depth of posterior neck                                       | 110  |
| Left jugal, width of infratemporal fenestra along ventral margin of bone  | 48   |
| Right jugal, total length                                                 | 365  |
| Right jugal, height of anterior process                                   | 177  |
| Right jugal, depth of anterior neck                                       | 76   |
| Right jugal, depth of posterior neck                                      | 120  |
| Right jugal, width of infratemporal fenestra along ventral margin of bone | 50   |
| Left nasal, total length                                                  | 570  |
| Left nasal, maximum width of circumnarial fossa along bone                | 42   |
| Right nasal, total length                                                 | 570  |
| Right nasal, maximum width of circumnarial fossa along bone               | 40   |
| Left lacrimal, total length                                               | 160  |
| Left lacrimal, width along posterior surface                              | 60   |
| Right lacrimal, total length                                              | 160  |
| Right lacrimal, width along posterior surface                             | 62   |
| Left prefrontal, total length                                             | 185  |
| Left prefrontal, maximum width                                            | 78   |
| Right prefrontal, maximum width                                           | 83   |
| Left palatine, total length                                               | 165* |
| Left palatine, total height                                               | 134  |
| Right palatine, total length                                              | 170  |
| Right palatine, total height                                              | 130  |
| Left quadrate, total height                                               | 420  |
| Left quadrate, width across pterygoid wing                                | 140  |
| Left quadrate, depth of quadratojugal notch                               | 140  |
| Left quadrate, width of ventral condyles                                  | 70   |
| Left quadrate, width of dorsal head                                       | 40   |
| Right quadrate, depth of quadratojugal notch                              | 140  |
| Right quadrate, width of dorsal head                                      | 28*  |
| Left quadratojugal, total length                                          | 122  |
| Left quadratojugal, total height                                          | 135  |
| Right quadratojugal, total length                                         | 122  |

|                                                                                  |            |
|----------------------------------------------------------------------------------|------------|
| Right quadratojugal, total height                                                | 135        |
| Left pterygoid, length of ventral part across ectopterygoid ramus                | 180        |
| Left pterygoid, height across articular surface for basipterygoid process        | 149        |
| Right pterygoid, length of ventral part across ectopterygoid ramus               | 180        |
| Right pterygoid, height across articular surface for basipterygoid process       | 165*       |
| Left dentary, total length                                                       | 770        |
| Left dentary, height across coronoid process                                     | 290        |
| Left dentary, length of dental battery                                           | 375        |
| Left dentary, length of apex of coronoid process                                 | 105        |
| Left dentary, maximum width of symphyseal process                                | 100        |
| Right dentary, total length                                                      | 780        |
| Right dentary, height across coronoid process                                    | 245*       |
| Right dentary, length of dental battery                                          | 375        |
| Right dentary, length of apex of coronoid process                                | 110        |
| Right dentary, maximum width of symphyseal process                               | 105        |
| Left surangular, height across laterodorsal flange                               | 43         |
| Left surangular, height across retroarticular process                            | 28*        |
| Right surangular, height across laterodorsal flange                              | 45         |
| Right surangular, height across retroarticular process                           | 33         |
| Left splenial, maximum height                                                    | 74*        |
| Right splenial, maximum height                                                   | 80         |
| Dentition, width of three selected tooth crowns in middle part of left maxilla   | 8, 8, 8    |
| Dentition, width of three selected tooth crowns in middle part of right maxilla  | 8, 8, 8    |
| Dentition, height of three selected tooth crowns in middle part of left dentary  | 38, 39, 37 |
| Dentition, width of three selected tooth crowns in middle part of left dentary   | 13, 13, 12 |
| Dentition, height of three selected tooth crowns in middle part of right dentary | 38, 38, 38 |
| Dentition, width of three selected tooth crowns in middle part of right dentary  | 12, 13, 13 |

---

\*The measurement is probably influenced by either taphonomic deformation or plaster reconstruction.
