# Supplementary material for: Supplementary cranial description of the types of Edmontosaurus regalis (Ornithischia: Hadrosauridae), with comments on the phylogenetics and biogeography of Hadrosaurinae
Source: PubMed Central journal article supplement (PMC5383305; doi:10.1371/journal.pone.0175253), 2017-04-06
Supplement: pone.0175253.s003.pdf [file pone.0175253.s003.pdf]

## S2 Table

### Biostratigraphic information for hadrosaurine species used in the biogeographic analysis

Table 1 Published biostratigraphic data of selected hadrosaurine taxa adopted in this paper

| Taxon                                                                                | Stratigraphic range                                                             | Location                                                    | Landmass                      | Age                                                                                  |
|--------------------------------------------------------------------------------------|---------------------------------------------------------------------------------|-------------------------------------------------------------|-------------------------------|--------------------------------------------------------------------------------------|
| <b>Hadrosaurini</b>                                                                  |                                                                                 |                                                             |                               |                                                                                      |
| <i>Hadrosaurus foulkii</i><br>Leidy, 1858; Prieto-Márquez et al., 2006               | Woodbury Formation<br>(precise horizon unknown)                                 | northern New Jersey, USA                                    | North America<br>(Appalachia) | early–middle Campanian<br>80.5–78.5 Ma*<br>Gallagher, 2005; Ross and Fastovsky, 2006 |
| <b>Brachylophosaurini</b>                                                            |                                                                                 |                                                             |                               |                                                                                      |
| <i>Acristavus gagslarsoni</i><br>Gates et al., 2011                                  | lower part of Two Medicine Formation;<br>middle part of Wahweap Formation       | northern Montana, USA;<br>southern Utah, USA                | North America<br>(Laramidia)  | early Campanian<br>80.7–79.7 Ma*<br>Freedman Fowler and Horner, 2015                 |
| <i>Maiasaura peeblesorum</i><br>Horner and Makela, 1979                              | middle to upper part of Two Medicine Formation                                  | northern Montana, USA                                       | North America<br>(Laramidia)  | middle Campanian<br>~76.7 Ma*<br>Varricchio et al., 2010                             |
| <i>Brachylophosaurus canadensis</i><br>Sternberg, 1953; Cuthbertson and Holmes, 2010 | middle to upper part of Judith River Formation; middle part of Oldman Formation | northern and central Montana, USA; southern Alberta, Canada | North America<br>(Laramidia)  | middle Campanian<br>79.0–77.8 Ma*<br>Freedman Fowler and Horner, 2015                |

|                                                                        |                                                                            |                                                         |                              |                                                                                  |
|------------------------------------------------------------------------|----------------------------------------------------------------------------|---------------------------------------------------------|------------------------------|----------------------------------------------------------------------------------|
| <i>Probrachylophosaurus bergei</i><br>Freedman Fowler and Horner, 2015 | middle part of Judith River Formation                                      | northern Montana, USA                                   | North America<br>(Laramidia) | early Campanian<br>79.8–79.5 Ma*<br>Freedman Fowler and Horner, 2015             |
| <i>Wulagasaurus dongi</i><br>Godefroit et al., 2008                    | upper part of Yuliangzi Formation                                          | northern Heilongjiang, China                            | Asia                         | middle Maastrichtian<br>(specific age uncertain)<br>Markevich et al., 2009       |
| <b>Kritosaurini</b>                                                    |                                                                            |                                                         |                              |                                                                                  |
| <i>Kritosaurus navajovius</i><br>Brown, 1910; Prieto-Márquez, 2014     | upper part of Kirtland Formation; lower part of Cerro del Pueblo Formation | northwestern New Mexico, USA; southern Coahuila, Mexico | North America<br>(Laramidia) | late Campanian<br>73.7–71.5 Ma*<br>Eberth et al., 2004; Sullivan and Lucas, 2006 |
| <i>Gryposaurus latidens</i><br>Horner, 1992                            | lower part of Two Medicine Formation                                       | northern Montana, USA                                   | North America<br>(Laramidia) | early Campanian<br>80.0–78.0 Ma*<br>Horner et al., 2001                          |
| <i>Gryposaurus notabilis</i><br>Lambe, 1914                            | lower half of Dinosaur Park Formation                                      | southern Alberta, Canada                                | North America<br>(Laramidia) | middle Campanian<br>76.5–75.9 Ma*<br>Arbour et al., 2009; Mallon et al., 2012    |
| <i>Gryposaurus monumentensis</i><br>Gates and Sampson, 2007            | middle part of Kaiparowits Formation                                       | southern Utah, USA                                      | North America<br>(Laramidia) | middle–late Campanian<br>76.1–74.8 Ma*<br>Roberts et al., 2005                   |
| <i>Rhinorex condrupus</i><br>Gates and Scheetz, 2015                   | lower part of Neslen Formation                                             | eastern Utah, USA                                       | North America<br>(Laramidia) | middle Campanian<br>75.7–74.9 Ma*<br>Cobban et al., 2006                         |

|                                                                            |                                                                              |                                                                                                                                                                        |                              |                                                                                                                |
|----------------------------------------------------------------------------|------------------------------------------------------------------------------|------------------------------------------------------------------------------------------------------------------------------------------------------------------------|------------------------------|----------------------------------------------------------------------------------------------------------------|
| <i>Secernosaurus koernerii</i><br>Brett-Surman, 1979                       | upper part of Bajo Barreal Formation;<br>middle part of Los Alamos Formation | southern Chubut, Argentina;<br>southeastern Rio Negro,<br>Argentina                                                                                                    | South America                | late Campanian–early<br>Maastrichtian<br>(specific age uncertain)<br>Prieto-Márquez and Salinas,<br>2010       |
| <b>Edmontosaurini</b>                                                      |                                                                              |                                                                                                                                                                        |                              |                                                                                                                |
| <i>Edmontosaurus regalis</i><br>Lambe, 1917                                | middle part of Horseshoe Canyon<br>Formation                                 | southern Alberta, Canada                                                                                                                                               | North America<br>(Laramidia) | latest Campanian<br>72.5–71.0 Ma*<br>Campione and Evans, 2011;<br>Eberth et al., 2013                          |
| <i>Edmontosaurus annectens</i><br>Marsh, 1892; Campione and<br>Evans, 2011 | Lance, Hell Creek, and Frenchman<br>formations                               | southeastern Montana, USA;<br>northeastern Wyoming, USA;<br>southwestern North Dakota,<br>USA; northwestern South<br>Dakota, USA; southwestern<br>Saskatchewan, Canada | North America<br>(Laramidia) | late Maastrichtian<br>66.9–65.5 Ma*<br>Hicks et al., 2002; Lehman et<br>al., 2006                              |
| <i>Kerberosaurus manakini</i><br>Bolotsky and Godefroit, 2004              | lower to upper part of Udurchukan<br>Formation                               | southern Russian Far East                                                                                                                                              | Asia                         | early–middle Maastrichtian<br>(specific age uncertain)<br>Markevich and Bugdaeva,<br>2001; Herman et al., 2009 |
| <i>Shantungosaurus giganteus</i><br>Hu, 1973                               | top of Xingezhuang Formation to<br>middle of Hongtuya Formation              | southeastern Shandong, China                                                                                                                                           | Asia                         | middle–late Campanian<br>(specific age uncertain)<br>Yan et al., 2005; Liu et al., 2011                        |

---

**Saurolophini**

|                                                           |                                                                                    |                                                                                                     |                               |                                                                                                                 |
|-----------------------------------------------------------|------------------------------------------------------------------------------------|-----------------------------------------------------------------------------------------------------|-------------------------------|-----------------------------------------------------------------------------------------------------------------|
| <i>Lophorhothon atopus</i><br>Langston, 1960              | middle to upper part of Mooreville<br>Chalk Formation<br>(precise horizon unknown) | westcentral Alabama, USA                                                                            | North America<br>(Appalachia) | early Campanian<br>(specific age uncertain)<br>Langston, 1960; Kiernan, 2002                                    |
| <i>Prosaurolophus maximus</i><br>Brown, 1916              | upper half of Dinosaur Park Formation<br>upper part of Two Medicine Formation      | southern Alberta, Canada<br>northern Montana, USA                                                   | North America<br>(Laramidia)  | middle–late Campanian<br>75.7–74.1 Ma*<br>Mallon et al., 2012; McGarrity<br>et al., 2013                        |
| <i>Saurolophus osborni</i><br>Brown, 1912                 | middle to upper part of Horseshoe<br>Canyon Formation                              | southern Alberta, Canada                                                                            | North America<br>(Laramidia)  | early–middle Maastrichtian<br>70.4–68.4 Ma*<br>Eberth et al., 2013                                              |
| <i>Saurolophus angustirostris</i><br>Rozhdestvensky, 1952 | middle to upper part of Nemegt<br>Formation<br>(V. R. Alifanov pers. comm., 2013)  | southern Bayankhongor,<br>Mongolia; southern<br>Govi–Altai, Mongolia;<br>western Ömnögovi, Mongolia | Asia                          | early–middle Maastrichtian<br>(specific age uncertain)<br>Jerzykiewicz and Russell, 1991;<br>Jerzykiewicz, 2003 |

---

\*The absolute ages of designated taxa were estimated by the respective dating approaches, under the geologic time scale (GTS) established in 2009.

## References

- Arbour VM, Burns ME, Sissons RL (2009) A redescription of the ankylosaurid dinosaur *Dyoplosaurus acutosquameus* Parks, 1924 (Ornithischia: Ankylosauria) and a revision of the genus. *Journal of Vertebrate Paleontology* 29(4): 1117–1135.
- Bolotsky YL, Godefroit P (2004) A new hadrosaurine dinosaur from the Late Cretaceous of Far Eastern Russia. *Journal of Vertebrate Paleontology* 24: 354–368.
- Brett-Surman MK (1979) Phylogeny and palaeobiogeography of hadrosaurian dinosaurs. *Nature* 277: 560–562.
- Brown B (1910) The Cretaceous Ojo Alamo beds of New Mexico with description of the new dinosaur genus *Kritosaurus*. *Bulletin American Museum of Natural History* 28: 267–274.
- Brown B (1912) A crested dinosaur from the Edmonton Cretaceous. *Bulletin American Museum of Natural History* 31: 131–136.
- Brown B (1916) A new crested trachodont dinosaur *Prosaurolophus maximus*. *Bulletin American Museum of Natural History* 35: 701–708.
- Campione NE, Evans DC (2011) Cranial growth and variation in edmontosaurs (Dinosauria: Hadrosauridae): implications for latest Cretaceous megaherbivore diversity in North America. *PLoS ONE* 6(9): e25186.
- Cobban WA, Walaszczyk I, Obradovich JD, McKinney KC (2006) A USGS zonal table for the Upper Cretaceous Middle Cenomanian–Maastrichtian of the Western Interior of the United States based on ammonites, inoceramids, and radiometric ages. U.S. Geological Survey Open-File Report 2006-1250 pp. 1–46.
- Cuthbertson RS, Holmes RB (2010) The first complete description of the holotype of *Brachylophosaurus canadensis* Sternberg, 1953 (Dinosauria: Hadrosauridae) with comments on intraspecific variation. *Zoological Journal of the Linnean Society* 159: 373–397.
- Eberth DA, Delgado-de Jesús CR, Lerbekmo JF, Brinkman DB, Rodríguez-de la Rosa RA, Sampson SD (2004) Cerro del Pueblo Fm (Difunta Group, Upper Cretaceous), Parras Basin, southern Coahuila, Mexico: reference sections, age, and correlation. *Revista Mexicana de Ciencias Geológicas* 21(3): 335–352.
- Eberth DA, Evans DC, Brinkman DB, Therrien F, Tanke DH, Russell LS (2013) Dinosaur biostratigraphy of the Edmonton Group (Upper Cretaceous), Alberta, Canada: evidence for

- climate influence. *Canadian Journal of Earth Sciences* 50(7): 701–726.
- Freedman Fowler EA, Horner JR (2015) A new brachylophosaurin hadrosaur (Dinosauria: Ornithischia) with an intermediate nasal crest from the Campanian Judith River Formation of Northcentral Montana. *PLoS ONE* 10(11): e0141304.
- Gallagher WB (2005) Recent mosasaur discoveries from New Jersey and Delaware, USA: stratigraphy, taphonomy and implications for mosasaur extinction. *Netherlands Journal of Geosciences* 84(3): 241–245.
- Gates TA, Horner JR, Hanna RR, Nelson CR (2011) New unadorned hadrosaurine hadrosaurid (Dinosauria, Ornithopoda) from the Campanian of North America. *Journal of Vertebrate Paleontology* 31(4): 798–811.
- Gates TA, Sampson SD (2007) A new species of *Gryposaurus* (Dinosauria: Hadrosauridae) from the late Campanian Kaiparowits Formation, southern Utah, USA. *Zoological Journal of the Linnean Society* 151: 351–376.
- Gates TA, Scheetz R (2015) A new saurolophine hadrosaurid (Dinosauria: Ornithopoda) from the Campanian of Utah, North America. *Journal of Systematic Palaeontology* 13(8): 711–725.
- Godefroit P, Hai SL, Yu TX, Lauters P (2008) New hadrosaurid dinosaurs from the uppermost Cretaceous of northeastern China. *Acta Palaeontologica Polonica* 53: 47–74.
- Herman AB, Akhmetiev MA, Kodrul TM, Moiseeva MG, Iakovleva AI (2009) Flora development in Northeastern Asia and Northern Alaska during the Cretaceous-Paleogene transitional epoch. *Stratigraphy and Geological Correlation* 17(1): 79–97.
- Hicks JF, Johnson KR, Obradovich JD, Tauxe L, Clark D (2002) Magnetostratigraphy and geochronology of the Hell Creek and basal Fort Union Formations of southwestern North Dakota and a recalibration of the age of the Cretaceous-Tertiary boundary. *Geological Society of America Special Papers* 361: 35–55.
- Horner JR (1992) Cranial morphology of *Prosaurolophus* (Ornithischia: Hadrosauridae) with descriptions of two new hadrosaurid species and an evaluation of hadrosaurid phylogenetic relationships. *Museum of the Rockies, Occasional Paper* 2: 1–119.
- Horner JR, Makela R (1979) Nest of juveniles provides evidence of family structure among dinosaurs. *Nature* 282: 296–298.
- Horner JR, Schmitt JG, Jackson F, Hanna R (2001) Bones and rocks of the Upper Cretaceous Two

- Medicine – Judith River clastic wedge complex, Montana. Museum of the Rockies, Occasional Paper 3: 1–14.
- Hu CZ (1973) A new hadrosaur from the Cretaceous of Zhucheng, Shantung. *Acta Geologica Sinica* 2: 179–206.
- Jerzykiewicz T (2003) Lithostratigraphy and sedimentary settings of the Cretaceous dinosaur beds of Mongolia. In: Benton MJ, Shishkin MA, Unwin DM, Kurochkin EN, eds. *The Age of Dinosaurs in Russia and Mongolia*. Cambridge: Cambridge University Press. pp. 279–296.
- Jerzykiewicz T, Russell DA (1991) Late Mesozoic stratigraphy and vertebrates of the Gobi Basin. *Cretaceous Research* 12: 345–377.
- Kiernan CR (2002) Stratigraphic distribution and habitat segregation of mosasaurs in the Upper Cretaceous of western and central Alabama, with an historical review of Alabama mosasaur discoveries. *Journal of Vertebrate Paleontology* 22(1): 91–103.
- Lambe LM (1914) On *Gryposaurus notabilis*, a new genus and species of trachodont dinosaur from the Belly River Formation of Alberta. *Ottawa Naturalist* 27: 145–155.
- Lambe LM (1917) A new genus and species of crestless hadrosaur from the Edmonton Formation of Alberta. *Ottawa Naturalist* 31: 65–73.
- Langston WD (1960) The vertebrate fauna of the Selma Formation of Alabama, Part VI: the dinosaurs. *Fieldiana Geology Memoirs* 3: 313–363.
- Lehman TM, Mcdowell FW, Connelly JN (2006) First isotopic (U-Pb) age for the Late Cretaceous Alamosaurus vertebrate fauna of West Texas, and its significance as a link between two faunal provinces. *Journal of Vertebrate Paleontology* 26(4): 922–928.
- Leidy J (1858) *Hadrosaurus foulkii*, a new saurian from the Cretaceous of New Jersey, related to Iguanodon. *Proceedings of the Academy of Natural Sciences of Philadelphia* 10: 213–218.
- Liu YQ, Kuang HW, Peng N, Xu H, Liu YX (2011) Sedimentary facies of dinosaur trackways and bonebeds in the Cretaceous Jiaolai Basin of Shandong Province and their paleogeographical implications. *Earth Science Frontiers* 18(4): 9–24.
- Mallon JC, Evans DC, Ryan MJ, Anderson JS (2012) Megaherbivorous dinosaur turnover in the Dinosaur Park Formation (upper Campanian) of Alberta, Canada. *Palaeogeography, Palaeoclimatology, Palaeoecology* 350: 124–138.
- Markevich VS, Bugdaeva EV (2001) Correlation of the Upper Cretaceous and Palaeogene

- plant-bearing deposits of the Russian Far East. In: Bugdaeva E V ed. Flora and dinosaurs at the Cretaceous–Paleogene boundary of Zeya-Bureya Basin. Vladivostok: Dalnauka. pp. 79–96.
- Markevich VS, Bugdaeva EV, Sun G (2009) Palynoflora of Wulaga dinosaur site in Jiayin (Zeya-Bureya Basin, China). *Global Geology* 12(3): 117–121.
- Marsh OC (1892) Notice of new reptiles from the Laramie Formation. *American Journal of Science* (third series) 257: 449–453.
- McGarrity CT, Campione NE, Evans DC (2013) Cranial anatomy and variation in *Prosaurolophus maximus* (Dinosauria: Hadrosauridae). *Zoological Journal of the Linnean Society* 167(4): 531–568.
- Prieto-Márquez A (2014) Skeletal morphology of *Kritosaurus navajovius* (Dinosauria: Hadrosauridae) from the Late Cretaceous of the North American south-west, with an evaluation of the phylogenetic systematics and biogeography of Kritosaurini. *Journal of Systematic Palaeontology* 12(2): 133–175.
- Prieto-Márquez A, Salinas GC (2010) A re-evaluation of *Secernosaurus koernerii* and *Kritosaurus australis* (Dinosauria, Hadrosauridae) from the Late Cretaceous of Argentina. *Journal of Vertebrate Paleontology* 30(3): 813–837.
- Prieto-Márquez A, Weishampel DB, Horner JR (2006) The hadrosaurid dinosaur *Hadrosaurus foulkii* from the Campanian of the East coast of North America, with a review of the genus. *Acta Palaeontologica Polonica* 51: 77–98.
- Roberts EM, Deino AL, Chan MA (2005)  $^{40}\text{Ar}/^{39}\text{Ar}$  Ar age of the Kaiparowits Formation, southern Utah, and correlation of contemporaneous Campanian strata and vertebrate faunas along the margin of the Western Interior Basin. *Cretaceous Research* 26: 307–318.
- Ross MR, Fastovsky DE (2006) Trans-Atlantic correlations of Upper Cretaceous marine sediments: the Mid-Atlantic (USA) and Maastricht (Netherlands) regions. *Northeastern Geology and Environmental Sciences* 28(1): 34–44.
- Rozhdestvensky AK (1952) A new representative of the duck-billed dinosaurs from the Upper Cretaceous deposits of Mongolia. *Dokladi Akademii Nauk USSR* 86: 405–408.
- Sternberg CM (1953) A new hadrosaur from the Oldman Formation of Alberta: discussion of nomenclature. *Bulletin of the National Museum of Canada* 128: 275–286.
- Sullivan RM, Lucas SG (2006) The Kirtlandian land-vertebrate “age” – faunal composition,



temporal position and biostratigraphic correlation in the nonmarine Upper Cretaceous of western North America. *New Mexico Museum of Natural History and Science Bulletin* 35: 7–29.

Varricchio DJ, Koeberl C, Raven RF, Wolbach WS, Elsik WC, Miggins DP (2010) Tracing the Manson impact event across the Western Interior Cretaceous Seaway. *Geological Society of America Special Paper* 465: 269–299.

Yan J, Chen JF, Xie Z, Gao TS, Foland KA, Zhang XD, et al. (2005) Studies on petrology and geochemistry of the Late Cretaceous basalts and mantle-derived xenoliths from eastern Shandong. *Acta Petrologica Sinica* 21(1): 99–112.
