# Supplementary material for: Supplementary cranial description of the types of Edmontosaurus regalis (Ornithischia: Hadrosauridae), with comments on the phylogenetics and biogeography of Hadrosaurinae
Source: PubMed Central journal article supplement (PMC5383305; doi:10.1371/journal.pone.0175253), 2017-04-06
Supplement: pone.0175253.s005.pdf [file pone.0175253.s005.pdf]

## S2 Text

### Probability calculation of ancestral areas for nodes within Hadrosaurinae

**Abbreviations:** a, Asia; e, Europe; n, North America; na, not applicable; P, probabilities; s, South America.

#### Node 1

$P(\textit{Hadrosaurus foulkii}) \times P(\text{node 2}) \times P(\text{node 3})$  (polytomy)

Condition 1:  $[P(\textit{Hadrosaurus foulkii}) \times P(\text{node 2})] \times P(\text{node 3})$

Step C11:  $[1/1 \text{ n} \times (1/3 \text{ a}, 2/3 \text{ n})] \times (7/38 \text{ a}, 28/38 \text{ n}, 3/38 \text{ s})$

Step C12:  $(1/3 \text{ an}, 2/3 \text{ n}^2) \times (7/38 \text{ a}, 28/38 \text{ n}, 3/38 \text{ s})$

Step C13:  $(1/6 \text{ a}, 1/6 \text{ n} + 2/3 \text{ n}) \times (7/38 \text{ a}, 28/38 \text{ n}, 3/38 \text{ s})$

Step C14:  $(1/6 \text{ a}, 5/6 \text{ n}) \times (7/38 \text{ a}, 28/38 \text{ n}, 3/38 \text{ s})$

Step C15:  $7/228 \text{ a}^2, 28/228 \text{ an}, 3/228 \text{ as (na)}, 35/228 \text{ an}, 140/228 \text{ n}^2, 15/228 \text{ ns}$

Step C16:  $7/228 \text{ a} + 28/456 \text{ a} + 35/456 \text{ a}, 28/456 \text{ n} + 35/456 \text{ n} + 140/228 \text{ n} + 15/456 \text{ n}, 15/456 \text{ s}$

Step C17:  $77/456 \text{ a}, 358/456 \text{ n}, 15/456 \text{ s}$

Step C18:  $77/450 \text{ a}, 358/450 \text{ n}, 15/450 \text{ s} \approx \text{a}, 17\%; \text{n}, 80\%; \text{s}, 3\%$ .

Condition 2:  $[P(\textit{Hadrosaurus foulkii}) \times P(\text{node 3})] \times P(\text{node 2})$

Step C21:  $[1/1 \text{ n} \times (7/38 \text{ a}, 28/38 \text{ n}, 3/38 \text{ s})] \times (1/3 \text{ a}, 2/3 \text{ n})$

Step C22:  $(7/38 \text{ an}, 28/38 \text{ n}^2, 3/38 \text{ ns}) \times (1/3 \text{ a}, 2/3 \text{ n})$

Step C23:  $(7/76 \text{ a}, 7/76 \text{ n} + 28/38 \text{ n} + 3/76 \text{ n}, 3/76 \text{ s}) \times (1/3 \text{ a}, 2/3 \text{ n})$

Step C24:  $(7/76 \text{ a}, 66/76 \text{ n}, 3/76 \text{ s}) \times (1/3 \text{ a}, 2/3 \text{ n})$

Step C25:  $7/228 \text{ a}^2, 66/228 \text{ an}, 3/228 \text{ as (na)}, 14/228 \text{ an}, 132/228 \text{ n}^2, 6/228 \text{ ns}$

Step C26:  $7/228 \text{ a} + 66/456 \text{ a} + 14/456 \text{ a}, 66/456 \text{ n} + 14/456 \text{ n} + 132/228 \text{ n} + 6/456 \text{ n}, 6/456 \text{ s}$

Step C27:  $94/456 \text{ a}, 350/456 \text{ n}, 6/456 \text{ s}$

Step C28:  $94/450 \text{ a}, 350/450 \text{ n}, 6/450 \text{ s} \approx \text{a}, 21\%; \text{n}, 78\%; \text{s}, 1\%$ .

Condition 3:  $[P(\text{node 2}) \times P(\text{node 3})] \times P(\textit{Hadrosaurus foulkii})$

Step C31:  $[(1/3 \text{ a}, 2/3 \text{ n}) \times (7/38 \text{ a}, 28/38 \text{ n}, 3/38 \text{ s})] \times 1/1 \text{ n}$

Step C32:  $[7/114 \text{ a}^2, 28/114 \text{ an}, 3/114 \text{ as (na)}, 14/114 \text{ an}, 56/114 \text{ n}^2, 6/114 \text{ ns}] \times 1/1 \text{ n}$

Step C33:  $(7/114 a + 28/228 a + 14/228 a, 28/228 n + 14/228 n + 56/114 n + 6/228 n, 6/228 s) \times 1/1 n$

Step C34:  $(56/228 a, 160/228 n, 6/228 s) \times 1/1 n$

Step C35:  $(56/222 a, 160/222 n, 6/222 s) \times 1/1 n$

Step C36:  $56/222 an, 160/222 n^2, 6/222 ns$

Step C37:  $56/444 a, 56/444 n + 160/222 n + 6/444 n, 6/444 s$

Step C38:  $56/444 a, 382/444 n, 6/444 s \approx a, 13\%; n, 86\%; s, 1\%$ .

$P(\text{condition 1}) + P(\text{condition 2}) + P(\text{condition 3})$

Step 1:  $(77/450 a, 358/450 n, 15/450 s) + (94/450 a, 350/450 n, 6/450 s) + (56/444 a, 382/444 n, 6/444 s)$

Step 2:  $77/450 a + 94/450 a + 56/444 a, 358/450 n + 350/450 n + 382/444 n, 15/450 s + 6/450 s + 6/444 s$

Step 3:  $101124/199800 a, 486252/199800 n, 12024/199800 s$

Step 4:  $101124/599400 a, 486252/599400 n, 12024/599400 s \approx a, 17\%; n, 81\%; s, 2\%$ .

## Node 2

$P(Wulagasaurus dongi) \times P(Acristavus gagslarsoni) \times P(\text{node 4})$  (polytomy)

Condition 1:  $[P(Wulagasaurus dongi) \times P(Acristavus gagslarsoni)] \times P(\text{node 4})$

Step C11:  $(1/1 a \times 1/1 n) \times 1/1 n$

Step C12:  $1 an \times 1/1 n$

Step C13:  $(1/2 a, 1/2 n) \times 1/1 n$

Step C14:  $1/2 an, 1/2 n^2$

Step C15:  $1/4 a, 1/4 n + 1/2 n$

Step C16:  $1/4 a, 3/4 n = a, 25\%; n, 75\%$ .

Condition 2:  $[P(Wulagasaurus dongi) \times P(\text{node 4})] \times P(Acristavus gagslarsoni)$

Step C21:  $(1/1 a \times 1/1 n) \times 1/1 n$

Step C22:  $1 an \times 1/1 n$

Step C23:  $(1/2 a, 1/2 n) \times 1/1 n$

Step C24:  $1/2 an, 1/2 n^2$

Step C25:  $1/4 a, 1/4 n + 1/2 n$

Step C26:  $1/4 a, 3/4 n = a, 25\%; n, 75\%$ .

Condition 3:  $[P(Acristavus\ gagslarsoni) \times P(\text{node } 4)] \times P(Wulagasaurus\ dongi)$

Step C31:  $(1/1 n \times 1/1 n) \times 1/1 a$

Step C32:  $1 n^2 \times 1/1 a$

Step C33:  $1/1 n \times 1/1 a$

Step C34:  $1 an$

Step C35:  $1/2 a, 1/2 n = a, 50\%; n, 50\%$ .

$P(\text{condition } 1) + P(\text{condition } 2) + P(\text{condition } 3)$

Step 1:  $(1/4 a, 3/4 n) + (1/4 a, 3/4 n) + (1/2 a, 1/2 n)$

Step 2:  $1/4 a + 1/4 a + 1/2 a, 3/4 n + 3/4 n + 1/2 n$

Step 3:  $4/4 a, 8/4 n$

Step 4:  $4/12 a, 8/12 n \approx a, 33\%; n, 67\%$ .

### Node 3

$P(\text{node } 6) \times P(\text{node } 7)$

Step 1:  $(3/4 n, 1/4 s) \times (7/16 a, 9/16 n)$

Step 2:  $21/64 an, 27/64 n^2, 7/64 as (na), 9/64 ns$

Step 3:  $21/128 a, 21/128 n + 27/64 n + 9/128 n, 9/128 s$

Step 4:  $21/128 a, 84/128 n, 9/128 s$

Step 5:  $21/114 a, 84/114 n, 9/114 s \approx a, 18\%; n, 74\%; s, 8\%$ .

### Node 4

$P(Maiasaura\ peeblesorum) \times P(\text{node } 5)$

Step 1:  $1/1 n \times 1/1 n$

Step 2:  $1 n^2$

Step 3:  $1 n = n, 100\%$ .

### Node 5

$P(Brachylophosaurus\ canadensis) \times P(Probrachylophosaurus\ bergei)$

Step 1:  $1/1 n \times 1/1 n$

Step 2:  $1 n^2$

Step 3:  $1 n = \mathbf{n, 100\%}$ .

### Node 6

P (*Kritosaurus navajovius*)  $\times$  P (node 8)

Step 1:  $1/1 n \times (1/2 n, 1/2 s)$

Step 2:  $1/2 n^2, 1/2 ns$

Step 3:  $1/2 n + 1/4 n, 1/4 s$

Step 4:  $3/4 n, 1/4 s = \mathbf{n, 75\%; s, 25\%}$ .

### Node 7

P (node 12)  $\times$  P (node 15)

Step 1:  $(3/4 a, 1/4 n) \times (1/8 a, 7/8 n)$

Step 2:  $3/32 a^2, 21/32 an, 1/32 an, 7/32 n^2$

Step 3:  $3/32 a + 21/64 a + 1/64 a, 21/64 n + 1/64 n + 7/32 n$

Step 4:  $28/64 a, 36/64 n \approx \mathbf{a, 44\%; n, 56\%}$ .

### Node 8

P (*Secernosaurus koernerii*)  $\times$  P (node 9)

Step 1:  $1/1 s \times 1/1 n$

Step 2:  $1 ns$

Step 3:  $1/2 n, 1/2 s = \mathbf{n, 50\%; s, 50\%}$ .

### Node 9

P (node 10)  $\times$  P (node 11)

Step 1:  $1/1 n \times 1/1 n$

Step 2:  $1 n^2$

Step 3:  $1 n = \mathbf{n, 100\%}$ .

### Node 10

$P(\textit{Gryposaurus latidens}) \times P(\textit{Rhinorex condrupus})$

Step 1:  $1/1 n \times 1/1 n$

Step 2:  $1 n^2$

Step 3:  $1 n = \mathbf{n, 100\%}$ .

#### **Node 11**

$P(\textit{Gryposaurus monumentensis}) \times P(\textit{Gryposaurus notabilis})$

Step 1:  $1/1 n \times 1/1 n$

Step 2:  $1 n^2$

Step 3:  $1 n = \mathbf{n, 100\%}$ .

#### **Node 12**

$P(\textit{Kerberosaurus manakini}) \times P(\text{node 13})$

Step 1:  $1/1 a \times (1/2 a, 1/2 n)$

Step 2:  $1/2 a^2, 1/2 an$

Step 3:  $1/2 a + 1/4 a, 1/4 n$

Step 4:  $3/4 a, 1/4 n = \mathbf{a, 75\%; n, 25\%}$ .

#### **Node 13**

$P(\textit{Shantungosaurus giganteus}) \times P(\text{node 14})$

Step 1:  $1/1 a \times 1/1 n$

Step 2:  $1 an$

Step 3:  $1/2 a, 1/2 n = \mathbf{a, 50\%; n, 50\%}$ .

#### **Node 14**

$P(\textit{Edmontosaurus regalis}) \times P(\textit{Edmontosaurus annectens})$

Step 1:  $1/1 n \times 1/1 n$

Step 2:  $1 n^2$

Step 3:  $1 n = \mathbf{n, 100\%}$ .

### **Node 15**

$P(\textit{Lophorhodon atopus}) \times P(\text{node 16})$

Step 1:  $1/1 n \times (1/4 a, 3/4 n)$

Step 2:  $1/4 an, 3/4 n^2$

Step 3:  $1/8 a, 1/8 n + 3/4 n$

Step 4:  $1/8 a, 7/8 n \approx \mathbf{a, 13\%}; \mathbf{n, 87\%}$ .

### **Node 16**

$P(\textit{Prosaurolophus maximus}) \times P(\text{node 17})$

Step 1:  $1/1 n \times (1/2 a, 1/2 n)$

Step 2:  $1/2 an, 1/2 n^2$

Step 3:  $1/4 a, 1/4 n + 1/2 n$

Step 4:  $1/4 a, 3/4 n = \mathbf{a, 25\%}; \mathbf{n, 75\%}$ .

### **Node 17**

$P(\textit{Saurolophus angustirostris}) \times P(\textit{Saurolophus osborni})$

Step 1:  $1/1 a \times 1/1 n$

Step 2:  $1 an$

Step 3:  $1/2 a, 1/2 n = \mathbf{a, 50\%}; \mathbf{n, 50\%}$ .
